# Supplementary material for: Preference test of sound among multiple alternatives in rats
Source: PLoS One. 2018 Jun 13;13(6):e0197361. doi: 10.1371/journal.pone.0197361 (PMC5999090; doi:10.1371/journal.pone.0197361)
Supplement: S1 Fig — (XLSX) [file pone.0197361.s001.xlsx]

## Sheet: Sheet1
		Fig. 3				Fig. 4C				Fig. 3				Fig. 4C				Fig. 4A	Fig. 4B
Rat #	day	PI				PI(18-25)				T				T(18-25)				motionless	distance(session)																									Nose poking rate
		10kHz	20kHz	40kHz	Silent	10kHz	20kHz	40kHz	Silent	10kHz	20kHz	40kHz	Silent	10kHz	20kHz	40kHz	Silent		1	2	3	4	5	6	7	8	9	10	11	12	13	14	15	16	17	18	19	20	21	22	23	24	25
1	0	-0.27778	-0.055556	-0.16667	-0.38889	-0.33333	0	-0.5	0.33333	0.93945	0.88521	1.2323	0.94304	0.78809	1.0632	0.8885	1.7956	0.66667
2	0	-0.055556	-0.29474	-0.42857	-0.22222	0	-0.5	0	0.2	0.96188	1.1109	0.96291	0.98902	1	0.57338	1.3685	1.0582	0.625
3	0	-0.72222	-0.25	-0.62185	-0.5042	-0.83333	0.33333	-0.8	-0.5	0.88423	1.6811	0.6473	1.0627	1.6569	2.418	0.36763	0.72995	0.16667
4	0	-0.27778	-0.29474	-0.31092	-0.11111	0.2	0	-0.5	0	0.89108	0.98178	1.0003	1.1237	1.0324	1	0.93326	1.0343	0.625
5	0	-0.94737	-0.8	-0.34921	0.24603	-1	-0.71429	-0.46667	0.066667	0.56027	0.99745	1.1386	1.2401	0.86729	1.8186	0.74124	1.0302	0.36
6	0	-0.2619	-0.73684	-0.26471	-0.54762	0.42857	-0.71429	-0.46667	-1	1.455	1.0193	0.88325	0.85692	1.824	2.7676	0.91464	0.22146	0.32																										2
7	0	-0.61404	-0.25	-0.20635	-0.20635	-0.83333	0.28571	-0.16667	-0.66667	0.94917	1.331	0.88862	0.91855	0.64207	3.126	1.0714	0.4824	0.52
8	0	-0.72807	-0.51754	-0.54762	-0.13158	-0.83333	-0.66667	-0.5	0.33333	0.56711	0.96527	0.84003	1.6542	0.9521	0.96207	0.75429	1.3315	0.28
9	0	-0.63235	-0.65	-0.34921	-0.2	-0.33333	-1	-1	0.66667	0.55789	1.1991	0.98141	1.5343	0.10587	1.0842	0.8348	1.9751	0.32
10	0	-0.46825	-0.67544	-0.2619	-0.4	-0.6	-0.83333	-0.33333	-0.57143	0.74318	0.86048	1.1424	1.3276	0.65951	1.0171	0.83239	2.3225	0.32																										4
11	0	-0.11404	0	-0.14286	-0.061404	0.16667	0	0	-0.5	1.1008	1	0.85826	1.0645	1.3159	1	1	0.68408	0.88
12	0	-0.33333	-0.15	-0.031746	-0.11905	-0.5	0	0	0.2	1.073	0.79485	1.12	0.96393	0.95883	1.0125	1	1.0233	0.76
13	0	-0.11404	-0.55	-0.031746	-0.031746	0	0	0	0	0.85973	1.2051	1.0469	0.92687	1	1	1	1	0.76
14	0	-0.2807	-0.1	-0.1746	-0.1746	-0.33333	-0.85714	-0.33333	-0.13333	0.73633	1.1188	0.99241	1.1488	0.92507	1.1944	0.93026	1.0317	0.72
15	0	0.052632	-0.11404	-0.16667	-0.087302	0	0	0	0	1.0232	0.94332	0.93214	1.0869	1	1	1	1	0.88																										1
16	0	-0.15	-0.37302	-0.11905	-0.17544	0	0	0	0	0.99235	0.92049	1.0526	1.0378	1	1	1	1	0.68																										65
17	0	-0.69048	-0.40351	-0.45	-0.063492	-0.83333	-0.66667	0.14286	-0.26667	0.65207	1.327	0.88744	1.148	1.0638	0.73362	1.9044	0.83359	0.4																										68
18	0	-0.45	-0.61404	-0.2619	-0.095238	-1	0	0.16667	0.066667	1.0786	0.6723	1.3571	0.86762	0.73752	1	1.4985	0.84262	0.48	369.53	623.64	265.97	251.5	279.78	229.61	431.2	369.23	189.87	399.41	252.74	254.84	691.67	779.7	472.67	587.52	550.58	252.71	395.79	383.56	146.22	258.86	190.12	242.84	234.1	183
19	0	-0.45614	-0.2807	-0.20635	-0.45614	-0.33333	-0.33333	0	-0.33333	1.0158	0.96374	0.91357	1.1213	0.85591	1.1729	0.65732	1.3138	0.48	763.64	321.5	266.27	591.93	240.47	1180.6	748.19	790.09	210.94	231.41	266.09	555.93	1340	1305.5	799.34	581.83	1053.3	953.51	307.74	575.96	413.51	702.31	441.64	795.12	297.67	104
20	0	-0.1746	-0.80159	-0.12281	0	-0.33333	-1	0	0.33333	0.99889	0.56817	1.2959	1.2511	0.78273	0.52989	1.0276	1.6598	0.56	637.82	879.47	781.02	329	369.79	283.52	449.58	240.38	196.54	286.91	326.97	583.1	239.9	262.96	283.75	274.11	171.48	223.17	190.42	373.22	627.08	393.98	624.39	244.34	243.04	216
21	0	-0.55	-0.12281	-0.42857	0.079365	0	-1	0	0.4	1.0222	1.2521	0.82008	0.94797	1.5599	0.53082	1.471	0.81217	0.64	403.03	470.77	426.4	215.13	214.76	271.33	172.59	617.64	1121.8	1153.8	449.36	380.33	389.48	261.97	247.46	343.55	256.92	285.77	181.27	592.18	406.11	417.12	542.58	214.33	240.01	211
22	0	-0.78947	-0.45614	-0.18421	-0.49206	-0.85714	0	-0.16667	-0.46667	0.89777	1.0049	1.0847	1.0108	1.1263	1.1198	0.99861	0.87897	0.28																										2
23	0	0	0.05	-0.031746	-0.28571	0	0	0.16667	-0.33333	1.0385	1.0323	0.95559	0.98828	1.1926	0.90372	1.0266	0.98225	0.88																										7
24	0	-0.20635	-0.5	-0.80159	-0.12281	0.066667	-0.71429	-1	-0.33333	1.1334	1.2224	0.74366	0.95811	1.1076	1.2591	0.58889	1.1201	0.4																										61
25	0	-0.65	-0.34211	0.13492	-0.51587	0.14286	-0.33333	0	-0.33333	0.81187	1.2353	1.2437	0.68898	1.7315	0.96455	0.73845	0.95418	0.52																										124
26	0	-0.37302	-0.28571	0.15789	0.05	0	0	0	0	0.89139	0.77037	1.2688	1.151	1	1	1	1	0.8
27	0	-0.2807	-0.1	-0.11905	-0.23016	0	0	0	0	0.81834	0.72461	1.1013	1.2511	1	1.0008	0.99917	1	0.72																										3
28	0	-0.61404	-0.75	-0.031746	0.10317	0.14286	-0.5	0	-0.13333	0.80922	0.81154	1.0794	1.2188	0.93156	0.65564	1.3682	1.0069	0.56																										71
29	0	-0.33333	-0.50877	-0.078947	-0.37302	-0.5	-0.83333	-0.42857	-0.46667	0.67577	0.98255	1.309	1.028	0.71984	0.72507	2.6542	0.81864	0.52																										150
30	0	-0.11404	-0.67544	-0.40476	-0.070175	0	-0.85714	-0.5	0.16667	1.01	0.86844	0.98089	1.1438	0.96173	1.4154	0.57286	1.2768	0.52																										112
31	0	-0.50877	-0.40351	-0.17544	-0.49206	-0.85714	-0.33333	0.14286	-0.13333	0.89441	0.98231	1.0891	1.0293	1.5529	0.71446	1.137	1.0556	0.4																										31
32	0	-0.28947	-0.75	-0.11905	-0.46032	-0.71429	-0.66667	-0.33333	-0.33333	1.3588	0.73183	1.0891	0.7949	3.3261	0.25293	0.98869	0.73022	0.44																										266
33	0	0.052632	-0.39474	0.02381	-0.44737	0	0	0.16667	-0.5	1.0761	0.71511	1.2291	0.94155	1.0798	0.82757	1.1999	0.89279	0.72
34	0	-0.88889	-0.15	-0.49206	-0.41228	-0.8	-0.71429	-0.66667	-0.5	0.82688	1.477	0.628	1.2385	0.75893	2.4175	0.61175	1.0411	0.24	1411.8	1092.7	1163.5	1046	623.93	481.62	773.75	846	459.43	680.17	289.23	331.46	502.67	314.74	346.25	187.07	250.72	820.57	849.48	796.82	871.68	488.74	525.41	614.49	675.96	202
35	0	-0.67544	-0.6	-0.087302	0.19048	-0.5	0	0	0.2	1.1665	0.51928	0.94919	1.2515	0.65464	1	1	1.2302	0.6																										53
36	0	-0.74603	-0.57018	-0.35088	-0.35088	-1	-0.16667	-0.66667	-0.16667	0.70917	0.86898	1.3416	1.1287	0.35189	1.0644	1.237	1.3467	0.24																										57
37	0	-0.61404	-0.2807	-0.40476	0.035088	-0.8	0	-0.16667	-0.5	0.64809	0.9193	0.77689	1.6929	0.41846	1.218	0.90578	1.8575	0.52	572.31	477.97	513.63	614.5	455.01	280.21	352.21	213.57	217.09	235.76	328.31	339.84	328.87	602.83	545.58	586.39	435.3	679.48	622.83	474.21	484.61	776.69	515.46	601.19	687.17	136
38	0	-0.7807	-0.2807	0.10526	0.16667	-0.83333	-0.5	0.28571	0	0.67243	0.83829	1.271	1.1871	0.45671	0.61288	2.6258	1.0783	0.72	606.13	451.2	553.73	381.54	347.5	458.44	600.73	642.41	261.56	274.43	323.42	360.39	348.4	284.47	323.59	622.34	451.71	842.51	738.83	421.86	368.98	581.08	542.16	507.81	235.9	352
39	0	-0.44737	-0.2807	0	0.15789	-0.33333	0	0	0.14286	0.73524	0.88627	1.0512	1.3188	0.77191	1	1	1.6843	0.8	315.38	543.76	435.83	371.19	841.3	433	287.2	328.8	118.68	279.84	303.36	242.45	161.09	403.37	278.14	671.25	230.71	348.4	249.77	175.15	259.14	251.06	303.93	115.99	477.04	104
40	0	-0.88889	-0.25	-0.28947	-0.52381	-1	-0.42857	0.14286	-0.66667	0.54209	1.4702	1.2262	0.92814	0.13284	3.0374	2.2359	1.0977	0.24	1493.7	996.71	1013.7	1131.5	664.78	873.96	1436.4	405.71	669.46	336.28	785.04	324.7	304.13	669.51	1026.3	857.12	720.7	433.17	1169.2	1204.1	1289.3	1337.4	1153.6	1692.5	1970.6	279
41	0	0.2	-0.37302	0	-0.44737	0	0	0	0	1.399	0.74631	0.98549	0.9804	0.82738	1.2831	1.0569	0.83259	0.76	978.67	1051.7	491.16	584.16	683.94	831.87	596.1	290.19	442.44	456.94	485.98	407.95	491.26	304.19	324.75	319.82	282.42	290.94	605.17	861.2	269.54	171.93	275.47	238.91	320.44	49
18	1	-0.7807	-0.061404	0.13492	-0.50877					0.5613	0.81728	1.4003	1.0268					0.56	291.02	510.28	322.48	560.3	514.12	186.63	683.34	323.41	344.8	293.73	297.73	383.08	671.37	620.71	457.05	350.26	574.35	549.84	224.58	283.05	244.91	283.1	347.77	528.15	197.11
19	1	-0.2807	-0.17544	0.16667	-0.5					0.6843	0.96413	1.41	0.94155					0.72	271.73	672.26	275.89	955.34	466.58	1125.9	905.17	567.69	294.15	448.02	434.51	837.49	781.33	153.47	152.25	118.42	218.17	144.68	233.82	185.48	97.647	238.99	143.97	368.81	428.99
20	1	-0.33333	-0.11404	-0.087302	0.10526					0.59607	1.4012	1.015	1.1165					0.84	675.58	419.19	378.91	491.68	467.66	458.91	400.67	475.54	818.47	501.38	379.58	2294.9	994.36	315.64	281.84	580.54	462.02	525.5	584.61	457.31	384.26	367.09	389.31	435.73	507.3
21	1	-0.070175	-0.5614	-0.095238	-0.7807					0.73986	1.2539	1.4502	0.55598					0.44	1213.3	4902	1670.2	1250.7	1917.9	752.02	683.32	574.87	465.4	645.86	720.84	162.09	187.69	173.71	132.55	310.12	687.37	505.27	480.21	660.97	668.39	409.16	597.82	225.51	428.09
34	1	-0.40476	0.28571	-0.69118	-0.22807					2.0004	0.99618	0.78684	0.62108					0.52	306.05	511.44	548.32	230.48	653.32	512.6	322.79	564.13	261.72	425.96	535.31	327.37	327.05	636.21	454.63	747.78	1187.6	788.86	1007.7	586.13	1243.1	448.62	939.02	345.3	443.45
37	1	-0.44737	-0.2	0.02381	-0.031746					0.98148	1.0278	1.0063	0.99156					0.76	491.26	237.75	383.72	263.14	315.65	561.83	558.16	354.2	603.23	305.58	351.69	299.62	345.76	299.27	320.8	916.76	615.74	315.08	536.07	574.6	298.68	673.25	229.17	221.7	487.02
38	1	0	-0.44737	-0.31746	-0.2619					1.0764	0.7064	1.1985	0.97801					0.6	984.24	366.73	874.7	484.89	660.97	885.12	667.56	531.51	765.9	329.73	277.1	278.74	231.66	190.1	562.34	299.35	238.76	236.25	410.97	520.91	489.67	551.47	390.62	617.72	458.14
39	1	-0.22807	-0.7	0.055556	0.055556					0.80914	0.8445	1.2385	1.1079					0.76	421.05	246.1	413.78	229.57	330.64	194.83	223.6	222.88	279.45	260.64	463.91	438	321.4	327.08	226.82	351.7	191.27	351.01	372.51	396.66	465.6	232.78	664.77	247.18	329.1
40	1	-0.2	-0.22807	-0.087302	0.055556					1	0.77462	1.0877	1.1084					0.84	511.29	234.56	229.63	357.23	412.98	350.01	195.25	247.59	319.41	417.73	179.25	359.37	240.25	505.25	421.59	347.28	328.99	419.02	667.2	234.44	327.52	196.2	270.36	331.43	343
41	1	-0.1746	-0.44737	-0.11404	-0.0087719					0.92693	0.73432	1.085	1.318					0.72	505.26	714.46	329.49	740.69	759.43	371.61	505.45	219.99	322.78	345.96	249.04	276.75	352.61	279.92	379.47	358.21	303.37	114.36	77.554	246.28	357.15	391.08	378.33	684.29	262.19
18	2	-0.34211	-0.75	-0.15079	-0.20635					1.5256	0.63916	0.6366	1.1995					0.48	499.23	1039.6	1061.8	856.6	964.62	386.77	1110.9	1003.7	487.11	593.79	320.43	465.47	624.35	722.63	709.09	811.22	610.57	535.09	711.96	204.35	276.9	106.14	192.4	208.41	154.3
19	2	-0.28947	-0.1746	-0.16667	-0.22807					0.82383	0.9824	0.79989	1.3939					0.68	977.51	502.32	338.49	460.01	280.58	445.46	558.33	506.19	1092.8	735.98	224.47	605.56	283.26	274.17	328.71	228.55	394.5	354.68	416.88	390.64	287.33	329.73	360.13	274.53	334.17
20	2	-0.2807	-0.2	-0.28571	0.055556					1.1645	1.4145	0.72202	0.9298					0.76	468.84	627.89	1184.3	619.91	496.28	436.51	642.75	605.51	368.59	467.79	619.19	486.6	282.76	344.34	205.28	353	338.44	291.07	348.34	316.02	377.93	424.7	341.57	365.56	298.88
21	2	0	0	0	0					1	1.1248	0.93758	1					1	261.48	278.81	452.34	323.97	398.34	390.5	382.41	201.8	86.863	322.89	203.96	187.26	61.503	285.87	144.87	133.59	271.91	209.48	138.8	147.99	218.07	96.733	117.96	139.76	123.69
34	2	-0.017544	-0.72807	-0.74603	-0.070175					1.8699	0.57057	0.77793	1.2147					0.4	1597.3	1409.7	988.19	623.98	517.09	894.99	2137.8	395.84	692.03	828.35	591.96	1010.8	1084.5	770.31	1026.7	1309.2	1561.2	484.96	1699	1416.9	1328.5	840.71	582.52	775.12	767.58
37	2	-0.1	-0.57143	0.22222	-0.16667					1.0664	0.1508	1.6037	1					0.76	332.48	337.66	338.27	262.81	900.14	169.34	666.04	201.92	184.21	231.81	331.58	180.59	654.62	189.52	803.96	237.41	430.24	331.61	317.24	328.91	383.38	500.29	301.94	519.16	457.45
38	2	-0.33333	-0.15	-0.1746	0.11111					0.96679	0.89754	0.99441	1.1413					0.8	341.05	268.34	362.6	165.66	208.75	189.92	165.23	220.52	578.59	641.47	571.3	363.7	93.004	219.45	163.16	98.694	82.357	274.77	283.03	337.31	448.11	248.82	149.33	102.46	145.93
39	2	-0.42857	0.15	-0.28571	0.10526					0.79454	1.3916	1.1055	0.80365					0.8	536.91	269.37	268.02	212.66	321.99	200.67	160.77	200.02	324.31	201.26	186.93	338.35	252.86	133.88	132.47	180.23	256.93	224.04	278.63	219.87	219.33	199.33	572.99	311.53	341.21
40	2	-0.2	0.052632	-0.14286	-0.031746					1	0.83744	0.92728	1.2595					0.88	598.76	205.71	280.49	292.87	268	172.67	315.22	395.95	350.67	326.78	376.03	427.29	277.96	366.99	541.65	491.05	421.21	410.15	585.05	696.02	470.19	463.23	179.19	463.86	420.04
41	2	0.15	-0.39474	-0.11905	-0.42857					0.69681	0.65969	1.2487	1.2109					0.68	577.48	376.48	449.1	672.02	571.45	631.05	703.6	381.57	1009.1	316.98	802.57	618.37	546.19	323.33	280.94	294.69	269.24	370.39	610.45	554.68	194.98	267.86	77.769	195.87	301.19
18	3	-0.22807	-0.5	-0.31746	-0.15079					0.97819	1.2242	0.97441	0.90645					0.56	1190.3	675.94	289.8	591.46	911.29	656.19	486.49	604.74	478.76	843.11	349.89	608.35	206.78	335.33	575.55	194.24	216.51	380.39	512.52	265.84	493.68	305.64	801.72	471.58	344.97
19	3	-0.2	-0.087302	-0.14286	0.10526					0.67954	1.0869	0.95483	1.187					0.88	879.25	672.73	555.03	476.37	558.4	739.64	1062.5	1066.9	992.93	641.76	473.46	568.51	392.13	389.52	328.52	559.28	376.15	222.26	333.8	439.53	421.02	325.77	538.64	530.29	427.31
20	3	-0.15	0.14912	-0.65873	-0.40476					0.63077	1.5788	0.41434	1.7642					0.56	464.3	743.51	358.76	340.56	384.25	290.81	375.4	446.98	521.82	451.05	758.12	670.29	1227.1	1162.2	760.46	241.09	440.31	329.36	367.6	373.05	506.03	492.28	538.67	882.07	611.69
21	3	0.05	-0.14286	0.055556	-0.16667					1.34	0.75484	0.93173	1.1095					0.92	884.86	661.61	695.76	277.41	63.18	52.174	271.44	242.35	208.79	253.05	204.47	242.77	173.5	154.55	86.509	223.15	262.68	200.52	126.66	42.609	106.27	179.4	342.46	248.31	305
34	3	-0.0087719	-0.51587	-0.0087719	-0.50877					1.035	0.64032	1.5949	1.048					0.6	784.75	680.31	871.55	730.1	300.63	295.55	302.02	236.16	522.81	578.53	722.65	912.59	590.85	1210.3	261.26	714.28	319.04	434.66	560.21	465.04	252.5	740.6	714.03	1230.6	606.48
37	3	-0.2807	-0.3	-0.2619	-0.11905					0.9181	1.1101	1.0354	0.93646					0.64	962.7	547.64	830.89	563.71	252.03	302.24	597.78	320.4	268.5	296.66	538.85	650.56	1732.9	1206.6	863.69	1026.9	1667.4	305.02	607.53	369.17	822.28	660.88	1714.2	201.85	287.61
38	3	-0.66667	-0.0087719	-0.17544	-0.11905					1.1551	1.0745	0.96196	0.83528					0.64	427.42	417.45	480.13	776.5	566.61	672.48	345.23	250.32	273.17	384.14	485.33	460.3	738.56	670.68	419.4	377.83	404.18	346.19	396.5	409.56	683.61	446.55	296.54	279.6	447.25
39	3	-0.11404	-0.2	0	0.055556					1.1057	0.84139	1	1					0.92	319.19	243.17	297.44	307.69	191.73	182.34	201.13	226.71	327.44	275.07	460.73	402.7	362.68	685.29	299.07	322.51	422.49	263.01	403.18	240.2	277.06	145.39	256.65	226.4	298.86
40	3	0	-0.28571	0.10526	0					1.0418	0.69534	1.1052	1.2157					0.92	1091.1	822.46	412.67	239.55	324.25	224.28	343.8	346.31	143.67	348.55	250.01	269.5	275.38	249.88	130.39	269.39	266.22	191.15	154.56	184.39	208.44	166.7	173.59	311.57	152.79
41	3	0.05	0	0	-0.14286					1.495	1	1	0.83499					0.96	266.45	236.82	213.6	300.05	261.06	85.969	164.54	338.21	81.838	233.52	298.54	317.21	90.405	156.41	133.51	263.86	296.95	351.08	376.23	287.02	164.84	167.86	257.96	412.08	289.76
18	4	-0.2807	-0.1	-0.46032	0.11111					0.71241	1.2442	0.70662	1.3367					0.72	470.98	378.89	192.68	224.27	231.6	296.16	361.67	597.79	704.91	537.97	297.84	239.2	254.3	201.09	187.71	271.85	211.6	259.48	195.54	168.21	139.16	415.16	565.5	376.14	348
19	4	0	0.052632	0	-0.16667					1.0459	1.3728	0.93131	0.79716					0.96	650.56	447.21	313.89	519.43	512.82	452.32	325.88	313.84	383.98	1053.9	211.57	166.24	142.31	153.63	179.03	357.22	294.42	255.28	404.81	275.69	386.79	247.8	385.33	313.88	106.21
20	4	-0.37302	0.2	-0.57143	-0.0087719					0.5634	2.5905	0.74474	1.8068					0.68	261.21	526.38	269.02	275.08	504.67	373.1	321.89	671.1	522.65	466.05	991.68	876.77	462.23	358.58	293.25	437.65	338.84	300.92	368.49	265.52	282.51	210.35	227.02	275.61	191.7
21	4	-0.061404	-0.2807	-0.14286	0.052632					0.91804	0.96952	1.1574	0.89239					0.84	423.84	1057.7	460.78	638.55	784.84	583.47	386.01	422.14	319.47	264.7	805.64	454.62	321.88	272.67	147.17	167.65	221.35	286.33	192.33	87.08	189.75	65.912	187.86	81.503	212.12
34	4	-0.50735	-0.18421	-0.61404	0					1.0309	1.352	0.50129	1.1582					0.48	625.7	480.78	412.87	415.11	872.67	563.94	248.25	502.79	805.88	533.64	381.38	284.13	322.11	725.55	596.04	1002	1318.2	289.62	159.67	196.08	234.93	824.59	827.08	431.45	291.27
37	4	-0.5614	0.21053	-0.2807	-0.31746					0.49592	1.9471	1.005	1.0357					0.64	457.53	481.92	783.98	255.06	241.15	307.2	476.3	1243.1	376.69	378.54	610.11	391.14	332.28	230.29	226.89	276.79	215.05	274.97	229.92	381.51	344.59	296.52	487.8	620.19	423.83
38	4	-0.44118	-0.55	-0.31746	0.15					0.84339	0.78182	0.85343	1.8603					0.56	569.07	383.46	544.48	805.48	400.8	603.98	547.44	326.64	294.96	314.23	300.93	319.65	244.93	340.78	592.16	428.7	435.15	213.17	249.53	217.72	222.18	443.85	728.96	409.63	441.79
39	4	-0.16667	0.052632	-0.14286	-0.061404					0.95399	0.83928	1.2462	0.82492					0.88	421.79	507.77	641.88	341.63	1218.5	873.05	442.74	301.78	255.25	326.36	348.16	315.83	363.57	278.98	668.48	465.33	572.83	415.22	380.3	113.36	246.11	224.66	290.66	498.18	264.92
40	4	-0.22807	-0.1	-0.11905	-0.46032					1.2202	1.0272	0.89174	0.97032					0.64	1327.6	5221.3	3739.9	2225.8	1828.5	3378.1	2008.9	588.76	546.11	436.56	1467.7	1290.6	1463.8	543.54	518.93	401.72	426.61	363.16	276.06	317.91	227.72	258.74	289.97	171.18	287.31
41	4	-0.1	-0.17544	-0.37302	-0.1746					2.1191	1.2819	0.65721	0.70812					0.68	1104	497.99	1392.1	389.92	363.89	279.79	290.24	317.85	359.08	444.47	137.92	159.82	325.07	325.32	286.29	344.79	344.03	180.08	304.23	294.88	196.68	623.26	258.5	305.7	220.04
18	5	-0.6	-0.031746	-0.67544	-0.031746					1.2351	0.87535	0.87084	1.1401					0.56	1133	262	261.15	321.8	272.4	337.12	276.9	296.94	1206.5	977.14	673.14	307.91	368.23	334.9	319.37	239.95	196.76	472.3	341.8	447.21	517.41	311.5	707.09	315.57	1062.4
19	5	0.1	-0.16667	-0.087302	-0.23016					2.1757	0.80748	1.0602	0.7845					0.84	748.75	459.93	157.85	353.93	438.4	246.82	545.63	282.17	208.98	185.41	167.19	204.42	347.66	206.67	213.26	265.26	207.09	93.24	180.79	266.57	229.73	196.17	360.05	280.19	237.24
20	5	-0.22807	-0.15	-0.1746	-0.1746					1.3875	1.0939	0.99994	0.54995					0.72	1033.7	768.03	472.53	487.76	399.72	391.76	294.3	466.77	442.43	286.1	347.61	444.4	345.44	400.63	1195.5	917.39	925.96	755.43	596.94	845.53	501.68	820.4	501.94	244.06	124.05
21	5	-0.14286	0	0	0.05					0.82467	0.90982	1.0459	1.3489					0.96	347.12	311.61	526.03	428.02	472.58	529.52	657.04	406.61	359.67	323.6	366.45	272.52	231.23	334.48	331.45	203.87	334.93	261.54	250.83	180.37	244.72	184.2	238.81	231.8	397.3
34	5	-0.29825	-0.50877	-0.12281	-0.65873					1.3374	1.2042	0.75485	0.89774					0.4	907.24	631.98	347.71	961.94	947.84	796	880.95	1172.9	659.17	501.09	999.98	698.67	499.08	1264.1	991.42	407.5	890.39	932.48	590.34	903.23	513.99	737.26	902.36	824.52	582.36
37	5	-0.5	-0.44737	-0.063492	-0.20635					0.80337	0.77457	0.85707	1.5746					0.56	666.16	300.15	445	351.5	276.07	655.2	410.3	276.43	354.97	551.23	401.01	248.97	237.87	270.71	236.19	213.3	303.44	430.05	637.31	612.58	1107	531.3	1126.4	407.56	650.45
38	5	-0.11404	-0.087302	0.052632	-0.16667					1.2046	0.9189	1.2836	0.71443					0.88	402.98	444.61	714.16	548.36	314.62	357.45	267.03	454.32	585.34	291.1	281.28	354.05	293.68	300.57	251.3	292.51	254.4	343.26	410.68	315.29	288.73	169.8	71.622	110.66	671.06
39	5	-0.16667	-0.3	-0.087302	-0.031746					1.1525	1.0484	0.95955	0.86915					0.8	630.14	699.58	489.51	664.41	283.78	307.79	218.67	193.72	78.808	189.23	372.11	256.16	228.48	467.39	294.26	592.12	356.54	360.53	348.52	168.85	233.75	505.35	327.51	358.06	292.59
40	5	0	0.052632	-0.14286	0					1.0575	1.3696	0.94789	0.76558					0.96	777.71	652.81	201.17	504.44	194.61	334.5	280.04	427.56	375.33	296.75	302.52	391.82	336.18	265.59	409.75	328.97	319.14	277.43	204.18	210.21	123.9	205.35	207.7	132.69	124.33
41	5	-0.37302	-0.11404	-0.23016	0					0.83529	1.1842	0.70819	1.7289					0.72	1442.3	1798.5	1397.8	301.33	319.56	197.6	245.54	257.17	145.6	275.16	289.74	207.32	270.67	261.74	289.58	319.72	339.07	228.48	309.25	269.04	301.04	374.65	287	139.54	120.7
18	6	-0.2807	-0.15	-0.14286	0.11111					0.83264	1.251	0.83969	1.2137					0.84	552.04	505.84	350.84	342.23	335.9	341.79	497.43	623.12	679	135.3	235.07	245.73	203.84	252.36	325.89	341.27	681.97	301.28	567.71	282.95	346.94	340.66	211.14	221.6	209.33
19	6	-0.60317	-0.35	0.04386	-0.20635					0.45539	1.2655	1.3003	0.96716					0.56	475.6	460.61	587.86	1021.2	520.45	555.07	604.48	451.41	535.82	465.94	552.56	324.23	114.56	251.1	306.43	810.87	369.64	254.72	786.71	1011.9	844.32	992.12	737.82	400.31	999.77
20	6	0.10526	-0.2807	-0.61404	0.11111					1.1492	1.046	0.54885	1.2559					0.76	613.45	482.01	543.03	703.16	274.08	231.55	254.55	346.65	547.47	665.67	654.01	702.82	543.31	738.35	497.59	313.75	279.51	269.28	216.47	541.92	709.81	250.66	277.85	441.59	555.88
21	6	-0.1746	-0.061404	-0.087302	-0.35					0.95557	1.1688	0.99797	0.92413					0.76	531.78	409.55	529.17	446.27	199.14	240.03	300.19	268.71	260.19	416.85	436.53	924.17	458.96	531.25	693.23	284.63	218.11	240.07	461.71	471.16	215.94	71.428	196.98	115.86	110.29
34	6	-0.6	-0.65	-0.40476	-0.14706					2.7482	1.1727	0.81314	0.62024					0.36	1608.2	897.01	818.57	917.93	1031.3	769.63	638.12	796.14	978.53	718.82	801.71	475.69	610.45	1556.6	739.37	580.24	854.96	650.18	470.12	482.15	430.3	972.83	633.86	730.98	396.34
37	6	0.20175	-0.55	-0.42857	-0.31746					1.7295	0.7976	0.96126	0.7677					0.6	341.09	320.23	255.01	267.71	571.48	403.65	341.74	294.72	291.34	259.39	675.39	761.88	496.75	2178	1575.7	744.72	1536.5	404.83	287.79	521.14	543.13	243.31	193.81	590.36	927.35
38	6	-0.4	-0.5	0.079365	0.02381					0.59796	0.9387	0.84359	1.5379					0.72	479.19	380.79	334.26	352.42	303.66	567.94	710.9	355.77	403.76	356.66	518.58	221.2	210.7	153	355.34	759.51	379.16	686.09	463.74	431.88	250.54	257.7	216.94	175.79	187.24
39	6	-0.25	-0.22807	-0.1746	-0.14286					0.68483	1.3735	0.87748	1					0.72	311.83	347.84	452.22	286.77	395.27	381.13	374.05	291.02	233.32	341.62	257.92	308.03	296.22	318.83	667.9	463.43	377.87	660.04	582.48	407.24	388.56	298.34	286.27	877.88	330.79
40	6	0.052632	-0.16667	-0.031746	-0.16667					1.3016	1.0226	0.76249	1					0.88	476.57	237.81	215.47	179.47	193.81	153.7	199.75	168.39	322.69	171.94	261.82	233.67	435.64	407.21	336.66	224.81	307.94	111.7	206.78	214.73	233.96	169.53	249.26	15.082	124.06
41	6	-0.11404	0.15789	-0.31746	-0.33333					0.97358	1.6264	0.80662	0.64906					0.76	1214.6	1319.4	1534.4	999.81	669.83	452.59	294.09	350.88	311.69	233.07	277	445.79	551.39	719.72	300.69	143.18	274.07	214.56	326.76	361.88	213.61	137.58	113.41	211.52	148.9
